# Supplementary material
Source: Research Square preprint supplement (doi:10.21203/rs.3.rs-9034259/v1)
Supplement: Supplementary file 2 [file 2ce24152893ea784e9d8d4b0.docx]

# Table 5. Themes and Subthemes from Reflexive Thematic Analysis of Student Interviews (n = 8)

| Theme | Subtheme | Illustrative Quotes |
| --- | --- | --- |
| Personal Impact of ACEs on Health and Well-being | Emotional and physical toll; intergenerational effects; recognition and reflection | “Trauma and stress can lead to chronic dysfunction and affect relationships.” (Medical student, P3)  “If well-being wasn’t prioritized in childhood, it can compound burnout risk in healthcare.” (Medical student, P5) |
| ACEs and Healthcare Education | Lack of formal curriculum; calls for integration; concerns about implementation | “Knowing about ACEs helps you approach patients without fear or overconfidence.” (Medical student, P7)  “I’d learned about ACEs but never seen the questionnaire.” (Medical student, P1) |
| Self-Awareness and Professional Identity Formation | Personal adversity shaping motivations; professional boundaries; bias recognition | “Because [experience] happened to me, I want to be a different kind of practitioner.” (Medical student, P3)  “Encountering patients with similar experiences can be a strength, but you must anchor yourself in your professional role.” (Nursing student, P6) |
| Perceptions of the ACE questionnaire | Mixed emotional responses; perceived limitations of the tool; stigma and disclosure | “Simplistic, but a good introduction.” (OT student, P8)  “Some may not be ready to disclose; wording could validate without defining them.” (Medical student, P7) |
| ACEs and Burnout Prevention | Dual role of adversity (risk and resilience); coping strategies; emotional awareness | “Working in the ER during COVID, I realized anger meant it was time to leave.” (Medical student, P7)  “Resilience is applauded in healthcare, but it isn’t always healthy.” (Nursing student, P6) |
| Implications for Patient Care and Outcomes | Compassionate care; professional boundaries; trauma-informed clinical practice | “Shared experiences can deepen compassion and investment in patient outcomes.” (Medical student, P3)  “Boundaries are important… you don’t want to impose your trauma on patients.” (Nursing student, P7) |
