# Supplementary material
Source: Research Square preprint supplement (doi:10.21203/rs.3.rs-9034259/v1)
Supplement: Supplementary file 3 [file 60ae23724ddf882e92774116.docx]

Appendix B

**Interview Guide**

**Title of Study:** Assessing Early Life Adversity and Well-being among Healthcare Professional Students

**IRB #:** NCR246153

**Principal Investigator Name:** Patrick Corr, EdD

**Version Date:** 3/28/2025

**Individual Interviews - Semi-Structured Protocol**

*This semi-structured interview guide is subject to modification based on participant responses*

*and the direction of our conversations.*

Instructions for the Facilitator:

- Begin by reviewing the study informed consent document and reminding the participant
- of the purpose of this study.
- Let the participant know that by staying in the Zoom room, they are consenting to
- participate in this study.
- Remind the participant that they are not required to answer every question–they may
- choose not to answer some questions and they may withdraw from the study at any time.
- Remind the participant that the discussion will be audio recorded to facilitate transcription and that the raw recording will be deleted immediately upon transcription.
- Before beginning the questions, provide the participant with an opportunity to ask final questions

**Introduction**

*“Thank you for agreeing to participate in this interview. We're interested in learning how healthcare professional students perceive Adverse Childhood Experiences—or ACEs—and how understanding ACEs might matter in the context of training, professional development, and future patient care. We won’t ask you to share your personal ACEs or specific life experiences. Instead, this conversation is about your thoughts, impressions, and reflections on ACEs as a topic. You’re welcome to skip any question or stop the interview at any time. With your permission, we’d like to record this conversation to ensure we capture your insights accurately.”*

**Interview Questions**

1. **When you first encountered the ACEs questions in the survey, what were your initial thoughts or reactions?**
   *Probes: Did anything stand out? Feel surprising, validating, or concerning?*
2. **How comfortable or uncomfortable did you feel answering the ACEs questions? Why?**
3. **What are your thoughts on the ACEs questionnaire as a tool—do you think it’s a helpful or appropriate way to explore childhood adversity, especially in the context of healthcare education?”**
   *Probes: Did it feel comprehensive or limited? What was missing? Do you think it captures what it needs to? How could it be improved?*
4. **In your opinion, why might it be important to ask students in healthcare professions about their experiences with childhood adversity?** If you don’t think its important, why not?
5. **How, if at all, do you think understanding ACEs might affect a person’s experience in healthcare education or training?**
6. **Do you think knowledge about ACEs should be part of healthcare curricula? Why or why not?**
7. **In what ways, if any, do you think experiences with childhood adversity might affect well-being**? *Probes: Mental health, stress management, academic performance, relationships, burnout risk, support needs.*
8. **How might a healthcare provider’s own history with adversity influence how they connect with patients or deliver care?**
   *(Probes: Empathy, boundaries, emotional resilience, burnout, etc.)*
9. **Have you ever thought about how your own background, including challenges you’ve faced, might shape your approach to your future role as a healthcare provider?**
10. **Do you think reflecting on ACEs could influence someone’s choice to enter a helping profession or specialty? Why or why not?**
11. **How do you think acknowledging or understanding childhood adversity—whether in ourselves or our patients—might shape the kind of healthcare providers we become?** Probes: Does it influence empathy? Boundaries? Advocacy? Career direction? Self-awareness?

**Closing Script:**

*“Thank you so much for sharing your thoughts today. Is there anything else you’d like to add or share that we haven’t covered?*
