# Supplementary material
Source: Research Square preprint supplement (doi:10.21203/rs.3.rs-9034259/v1)

Appendix A


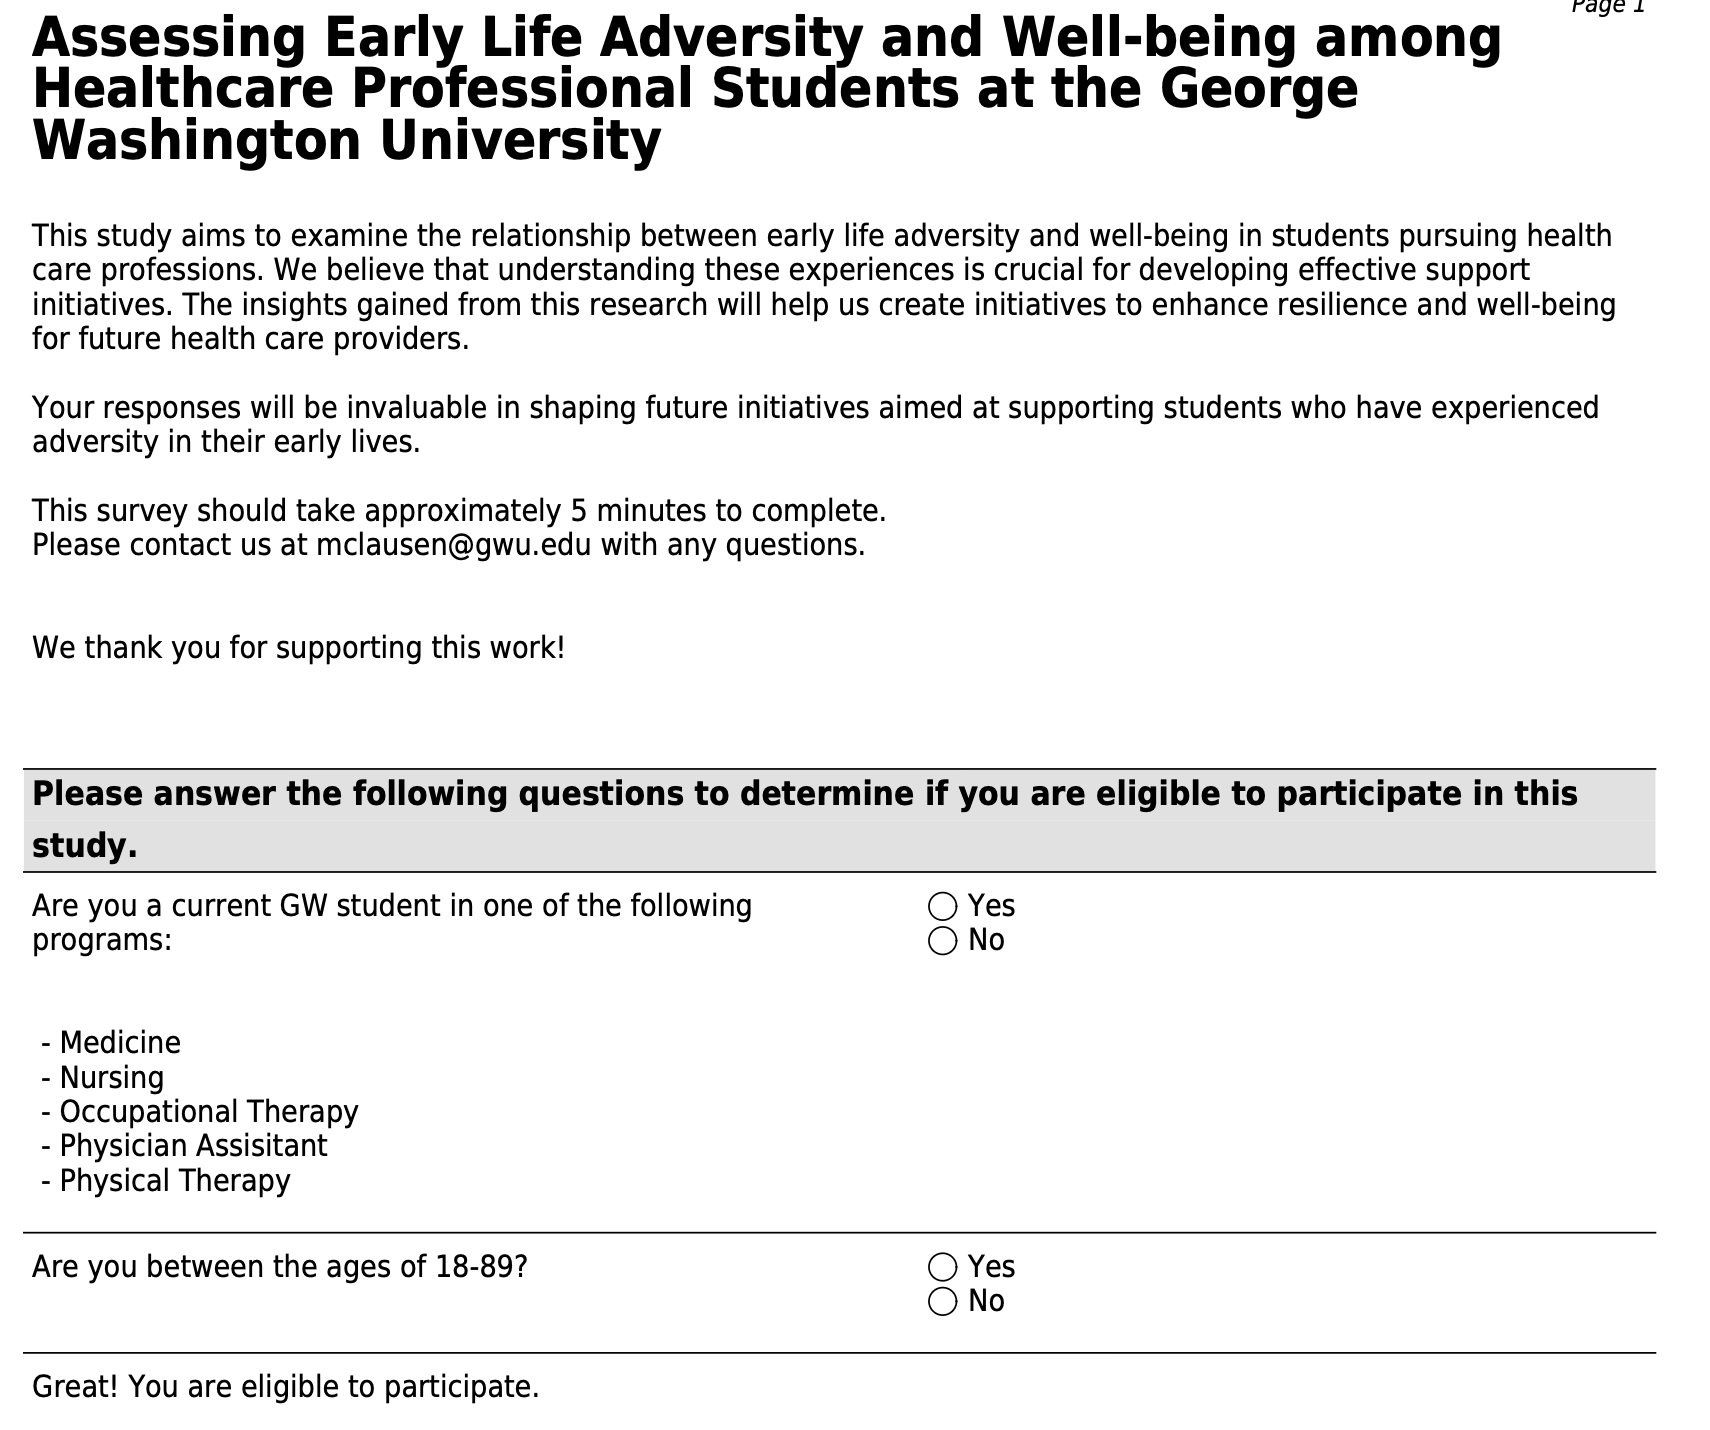


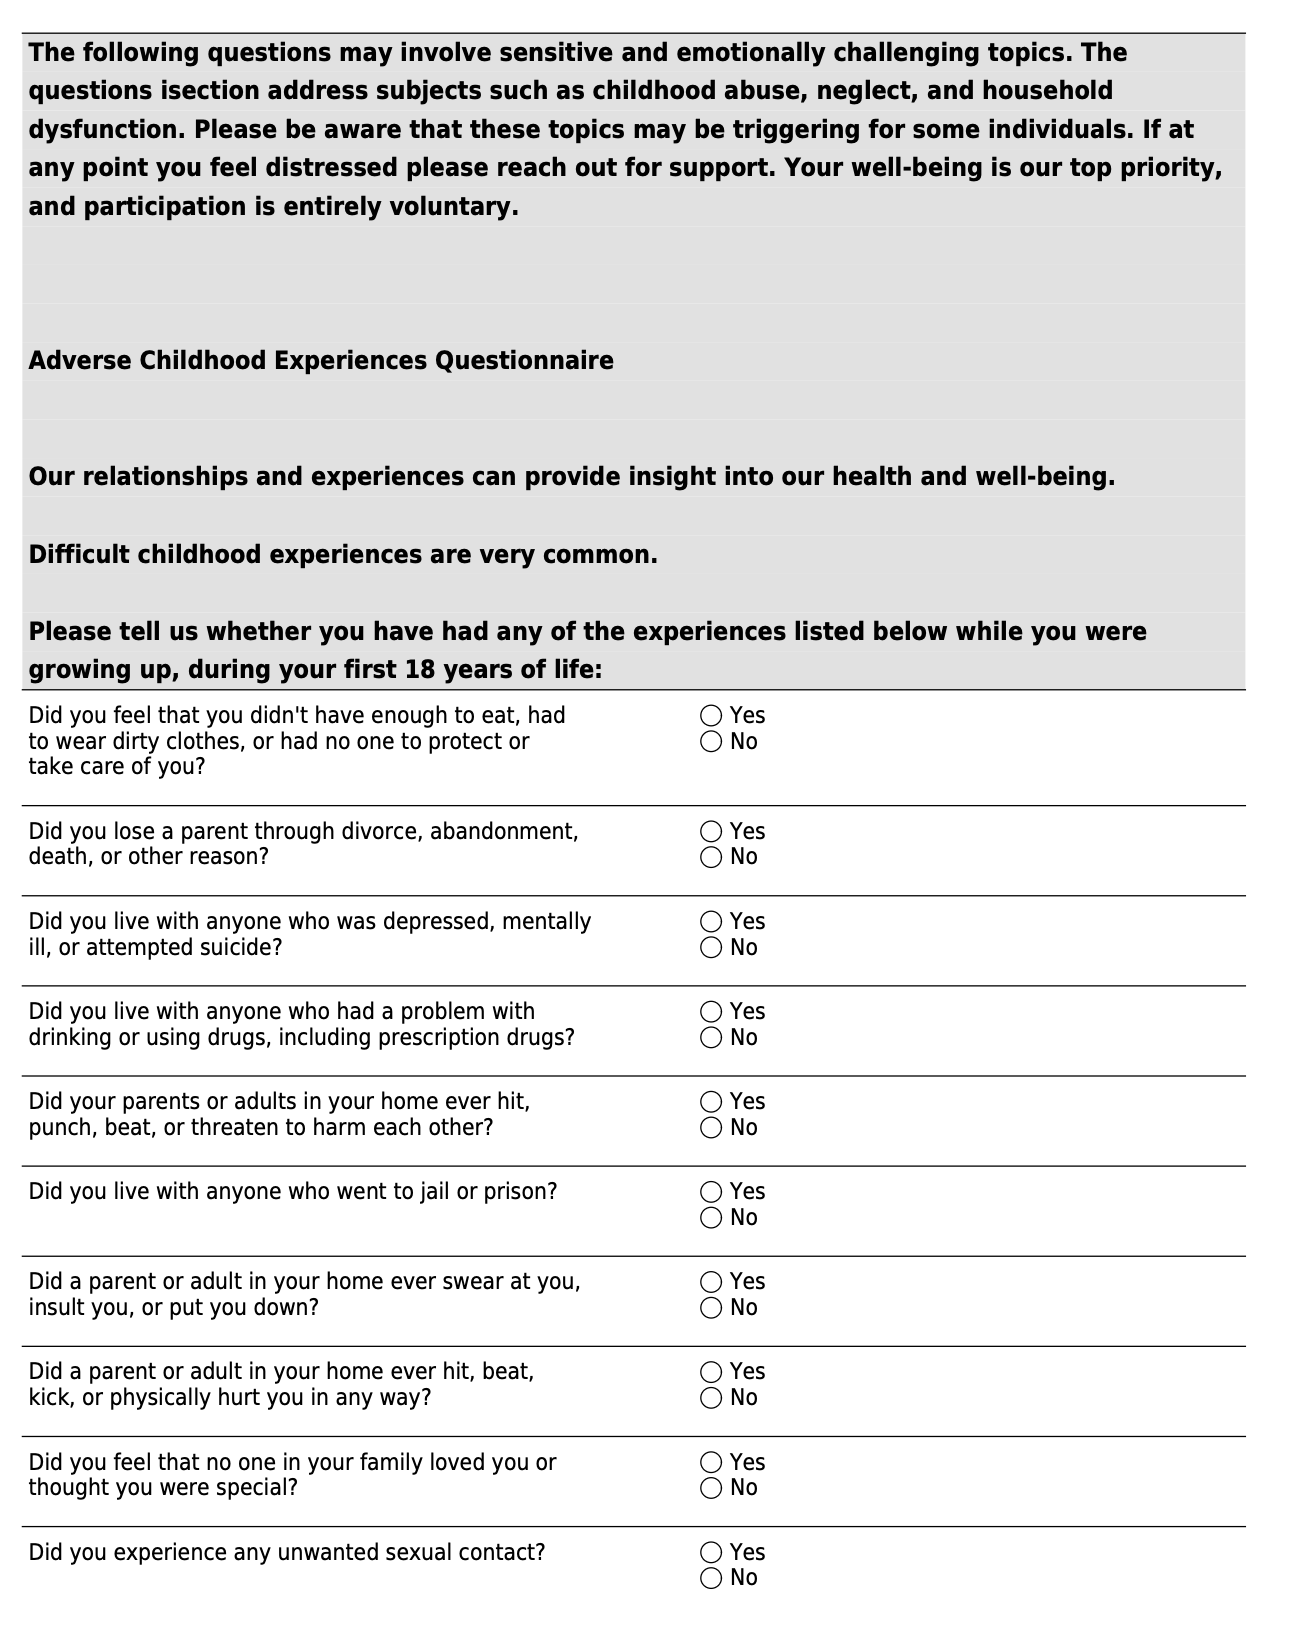


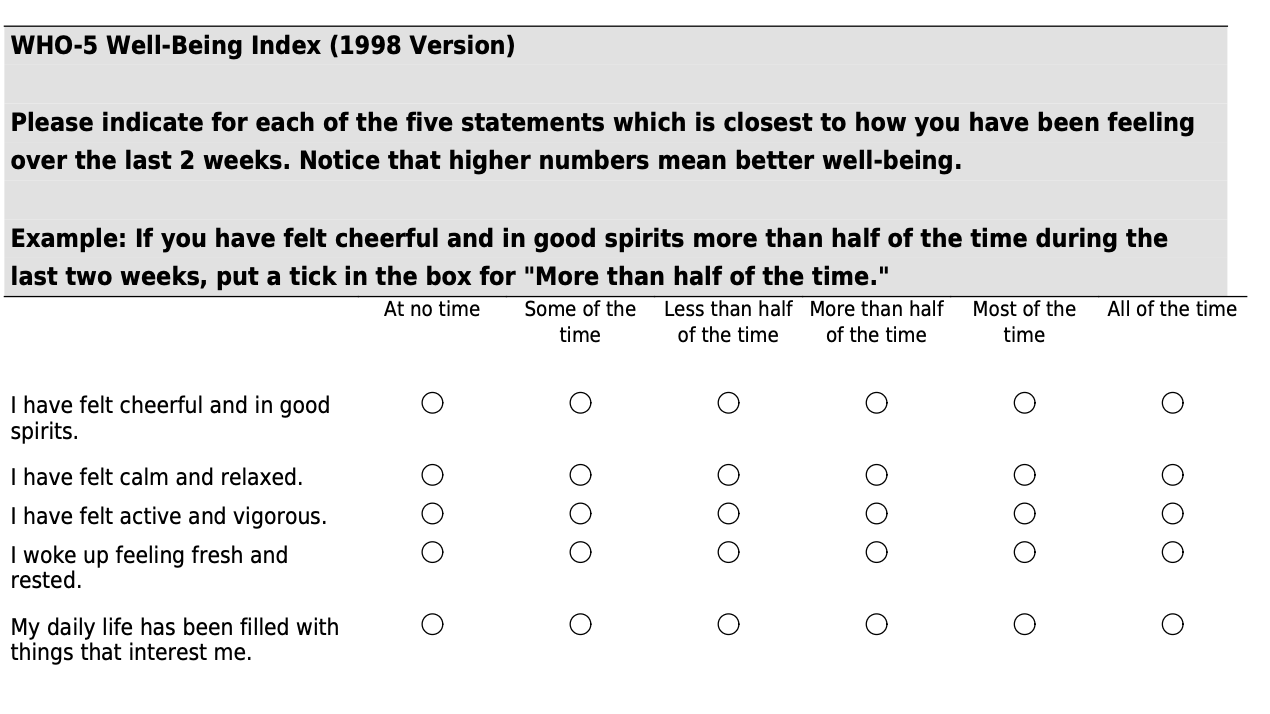


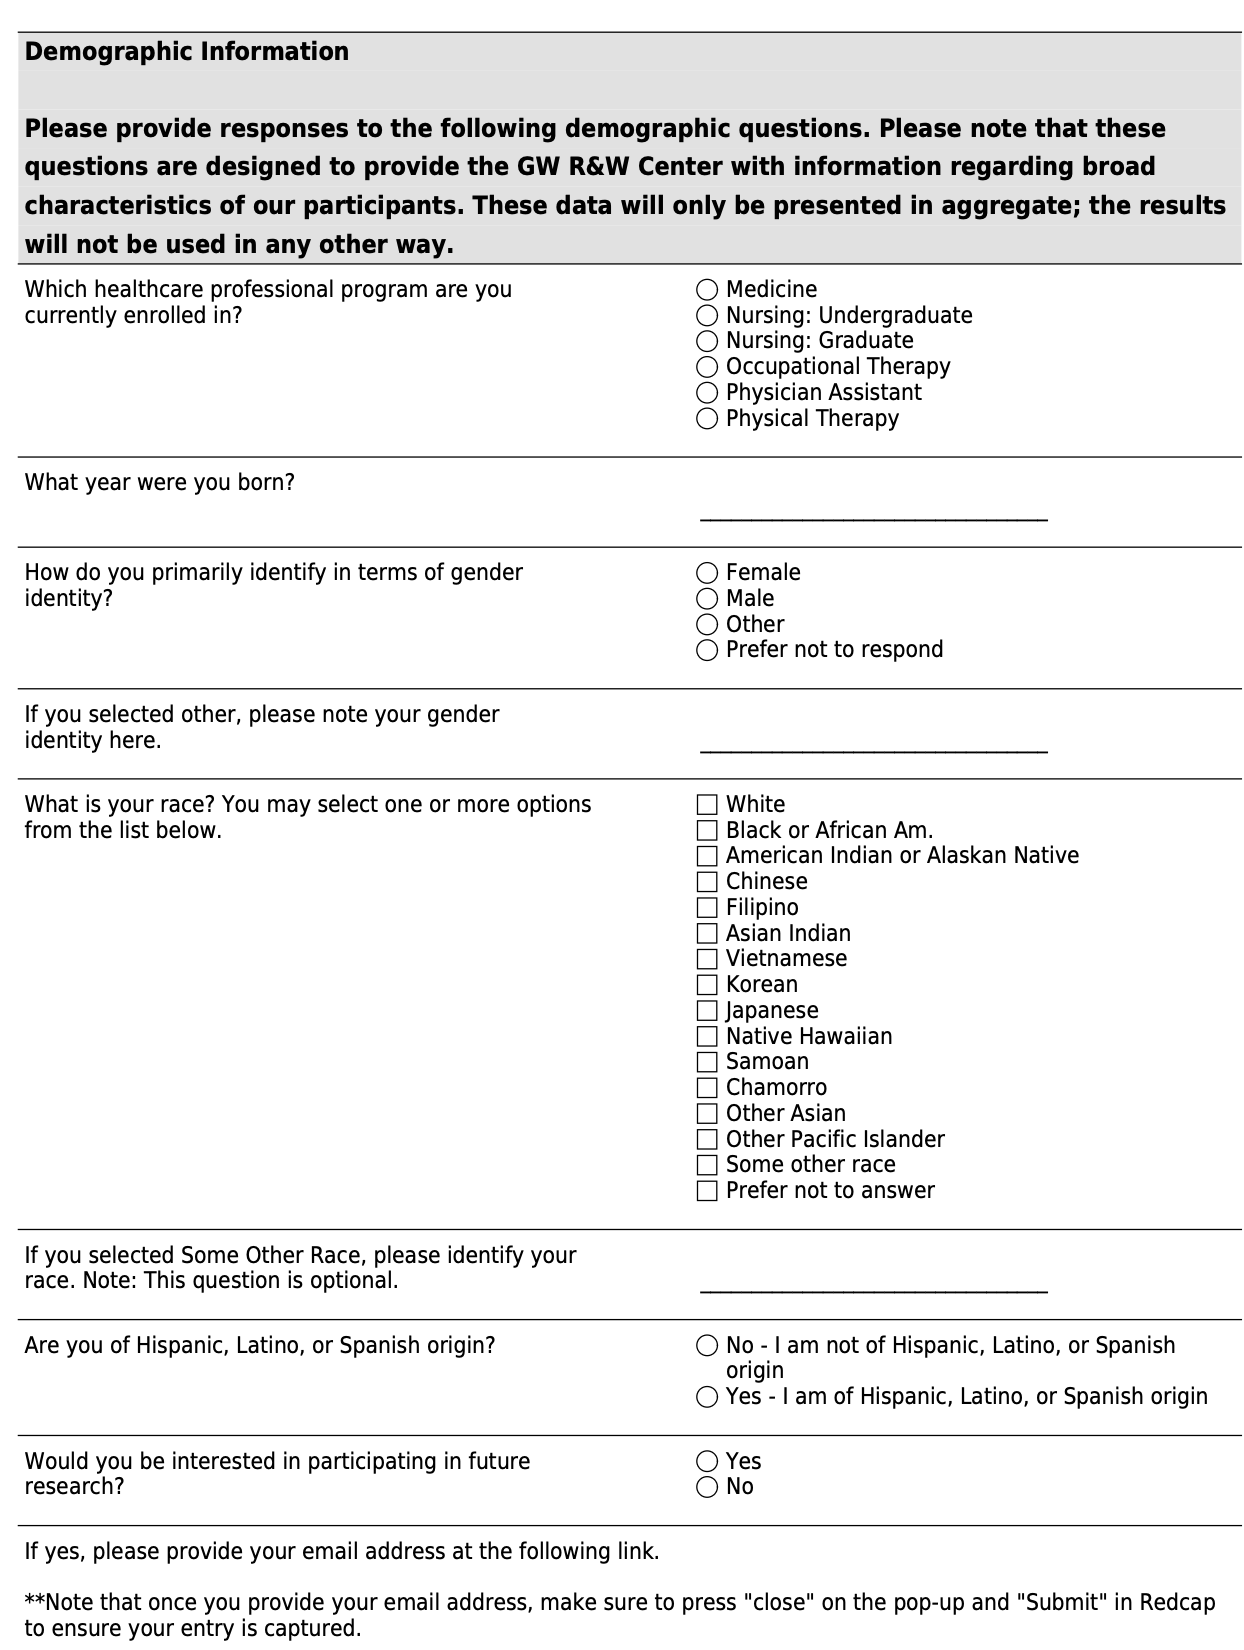

Supplement: Supplementary file 1 [file 059164bfd9ea23208a6b0536.docx]
